# Supplementary material for: Insights into Microalga and Bacteria Interactions of Selected Phycosphere Biofilms Using Metagenomic, Transcriptomic, and Proteomic Approaches
Source: PubMed Central journal article supplement (PMC5641341; doi:10.3389/fmicb.2017.01941), 2017-10-10
Supplement: Image_2.pdf [file Image_2.pdf]

### Supplemental FIGURES

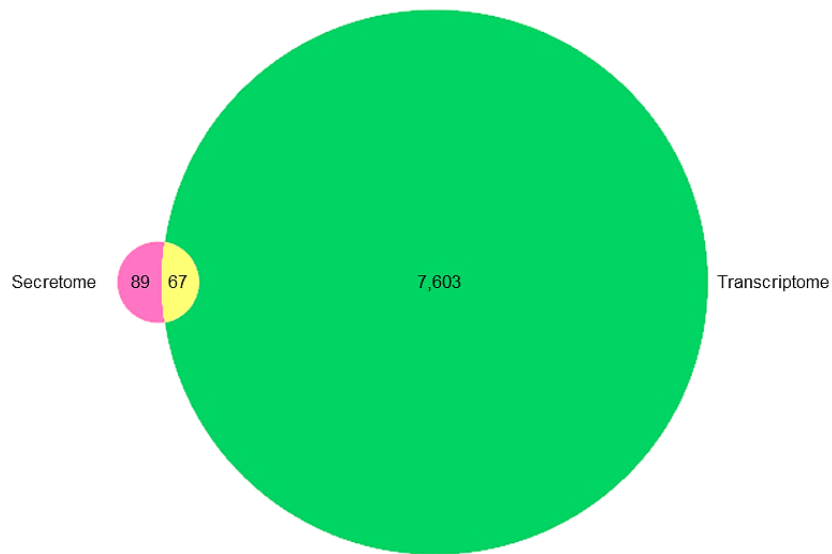

**FIGURE S2:** Venn diagram showing the number of uniquely regulated genes of the transcriptome-dataset (RPKM 10.0, green) versus the expressed proteins identified by the secretome-dataset (red) of *Scenedesmus quadricauda* (MZCH 10104).
